# Supplementary material
Source: publisher figshare collection journal article supplement (https://acs.figshare.com/ndownloader/files/4096864)
Supplement: Supplementary file 1 [file 4096864]

#######################################################################
#
#                 Cambridge Crystallographic Data Centre
#                                CCDC 
#
#######################################################################
#
# If this CIF has been generated directly or indirectly from an entry in the 
# Cambridge Structural Database, then it will include bibliographic, chemical, 
# crystal, experimental, refinement or atomic coordinate data resulting from 
# the CCDC's data processing and validation procedures. Files generated from 
# CSD entries are Copyright 2012 Cambridge Crystallographic Data Centre. They 
# may be used in bona fide research applications only, and may not be copied or 
# further disseminated in any form, whether machine-readable or not, except for 
# the purposes of generating routine backup copies on your local computer 
# system.
# 
# Files arising from any other source may also contain material that is the 
# copyright of third parties, including the originator, and you should check 
# with the originator concerning the permitted uses of the information 
# contained in this CIF.
#
# For further information on the CCDC and the free tools enCIFer and Mercury
# for validating and visualising CIF files, please visit www.ccdc.cam.ac.uk
#
#######################################################################

data_n2024
_symmetry_cell_setting           monoclinic
_symmetry_space_group_name_H-M   'P 21/c'
_symmetry_Int_Tables_number      14
loop_
_symmetry_equiv_pos_site_id
_symmetry_equiv_pos_as_xyz
1 x,y,z
2 -x,1/2+y,1/2-z
3 -x,-y,-z
4 x,1/2-y,1/2+z
_cell_length_a                   12.0952(6)
_cell_length_b                   7.2302(3)
_cell_length_c                   11.9514(6)
_cell_angle_alpha                90.00
_cell_angle_beta                 91.4570(10)
_cell_angle_gamma                90.00
_cell_volume                     1044.82
loop_
_atom_site_label
_atom_site_type_symbol
_atom_site_fract_x
_atom_site_fract_y
_atom_site_fract_z
S1 S 0.228208(19) 0.40775(3) 0.48864(2)
S2 S 0.069595(18) 0.16441(3) 0.364062(19)
F1 F 0.79319(5) -0.01441(10) 0.30630(6)
F2 F 0.79479(5) 0.28149(10) 0.29081(6)
F3 F 0.79848(5) 0.15480(9) 0.45380(5)
N1 N 0.28296(6) 0.14143(11) 0.34255(7)
C1 C 0.20256(7) 0.23402(12) 0.39693(7)
C2 C 0.39947(7) 0.15261(12) 0.34908(8)
C3 C 0.45563(8) 0.09215(13) 0.25469(8)
C4 C 0.57014(8) 0.08777(13) 0.25568(8)
C5 C 0.57417(7) 0.20604(13) 0.44476(8)
C6 C 0.45921(7) 0.20982(13) 0.44430(8)
C7 C 0.62932(7) 0.14419(12) 0.35106(8)
C8 C 0.75272(8) 0.14019(13) 0.35121(8)
H5 H 0.6166(11) 0.244(2) 0.5094(11)
H3 H 0.4139(10) 0.0536(18) 0.1910(11)
H6 H 0.4212(11) 0.246(2) 0.5105(11)
H4 H 0.6067(11) 0.046(2) 0.1916(11)
H1 H 0.2572(12) 0.065(2) 0.2930(12)
N2 N 0.97179(7) 0.29839(13) 0.60580(7)
H2A H 0.9193(14) 0.381(2) 0.5893(13)
H2B H 1.0127(14) 0.331(2) 0.6668(14)
H2C H 0.9434(15) 0.185(3) 0.6170(15)
H2D H 1.0123(16) 0.289(3) 0.5469(16)

#END
